# Supplementary material for: Retaining a Well-fixed Cone During Revision Total Knee Arthroplasty: Surgical Technique and Outcomes
Source: PubMed Central journal article supplement — Arthroplast Today. 2024 Oct 16;30:101477. doi: 10.1016/j.artd.2024.101477 (PMC11530812; doi:10.1016/j.artd.2024.101477), 2024-10-16
Supplement: mmc1.pdf [file mmc1.pdf]

# INDIVIDUAL CONFLICT OF INTEREST STATEMENT

## *American Association of Hip and Knee Surgeons*

(Adopted from the American Academy of Orthopaedic Surgeons disclosure statement)

The following form **must be filled out completely and submitted by each author (example, 6 authors, 6 forms).**  
**All items require a response. If there is no relevant disclosure for a given item, enter "None."**

### Retaining a Well-Fixed Cone During Revision Total Knee Arthroplasty: Surgical Technique and Outcomes

#### Manuscript Title

1. Royalties from a company or supplier (The following conflicts were disclosed) Stryker/ OsteoRemedies; Springer
2. Speakers bureau/paid presentations for a company or supplier (The following conflicts were disclosed) None
- 3A. Paid employee for a company or supplier (The following conflicts were disclosed) None
- 3B. Paid consultant for a company or supplier (The following conflicts were disclosed) None
- 3C. Unpaid consultants for a company or supplier (The following conflicts were disclosed) None
4. Stock or stock options in a company or supplier (The following conflicts were disclosed) None
5. Research support from a company or supplier as a Principal Investigator (The following conflicts were disclosed)  
None
6. Other financial or material support from a company or supplier (The following conflicts were disclosed) None
7. Royalties, financial or material support from publishers (The following conflicts were disclosed) None
8. Medical/Orthopaedic publications editorial/governing board (The following conflicts were disclosed) None
9. Board member/committee appointments for a society (The following conflicts were disclosed)  
AAHKS Board of Directors; IOEN Board of Directors; Mid-America Board of Directors

#### **Each author must sign AND print or type his/her name, date and submit a separate form**

In addition, one BLINDED Conflict of Interest form (no author names used) should be submitted per manuscript with all author disclosures.

Matthew P. Abdel, M.D.



2/5/2024

---

Author Name (Print or Type)

Author Signature

Date
