# Supplementary material for: Retaining a Well-fixed Cone During Revision Total Knee Arthroplasty: Surgical Technique and Outcomes
Source: PubMed Central journal article supplement — Arthroplast Today. 2024 Oct 16;30:101477. doi: 10.1016/j.artd.2024.101477 (PMC11530812; doi:10.1016/j.artd.2024.101477), 2024-10-16
Supplement: mmc5.pdf [file mmc5.pdf]

# INDIVIDUAL CONFLICT OF INTEREST STATEMENT

## *American Association of Hip and Knee Surgeons*

(Adopted from the American Academy of Orthopaedic Surgeons disclosure statement)

The following form **must be filled out completely and submitted by each author (example, 6 authors, 6 forms).**  
**All items require a response. If there is no relevant disclosure for a given item, enter "None."**

---

### **Retaining a Well-Fixed Cone During Revision Total Knee Arthroplasty: Surgical Technique and Outcomes**

#### **Manuscript Title**

1. Royalties from a company or supplier (The following conflicts were disclosed)  
Zimmer Biomet
  
2. Speakers bureau/paid presentations for a company or supplier (The following conflicts were disclosed)  
None
  
- 3A. Paid employee for a company or supplier (The following conflicts were disclosed)  
None
  
- 3B. Paid consultant for a company or supplier (The following conflicts were disclosed)  
Acuitive technologies; BIOS; Zimmer Biomet
  
- 3C. Unpaid consultants for a company or supplier (The following conflicts were disclosed)  
None
  
4. Stock or stock options in a company or supplier (The following conflicts were disclosed)  
Acuitive; BIOS; Ketai Medical Devices
  
5. Research support from a company or supplier as a Principal Investigator (The following conflicts were disclosed)  
Corin U.S.A.
  
6. Other financial or material support from a company or supplier (The following conflicts were disclosed)  
None
  
7. Royalties, financial or material support from publishers (The following conflicts were disclosed)  
None
  
8. Medical/Orthopaedic publications editorial/governing board (The following conflicts were disclosed)  
None
  
9. Board member/committee appointments for a society (The following conflicts were disclosed)  
Mid America Orthopedic Association; Orthopedic Research and Education Foundation

**Each author must sign AND print or type his/her name, date and submit a separate form**

In addition, one BLINDED Conflict of Interest form (no author names used) should be submitted per manuscript with all author disclosures.

---

Author Name (Print or Type)

Author Signature

Date
